# Supplementary material for: Mannose-binding lectin has a direct deleterious effect on ischemic brain microvascular endothelial cells
Source: PubMed Central journal article supplement — J Cereb Blood Flow Metab. 2019 Sep 7;40(8):1608–20. doi: 10.1177/0271678X19874509 (PMC7370363; doi:10.1177/0271678x19874509), 2019-09-07
Supplement: SupplementalMaterial.pdf [file SupplementalMaterial.pdf]

## Supplementary material

**Supplementary Table 1. Threshold cycle (Ct) for  $\beta$ -actin and for MBL2 gene expression real time RT-PCR (n.d., not determined).**

| Sample         | Ct actin    |             | Ct MBL2     |             |
|----------------|-------------|-------------|-------------|-------------|
|                | Replicate 1 | Replicate 2 | Replicate 1 | Replicate 2 |
| CTRL - rhMBL_1 | 23.0184     | 22.9187     | 44.3422     | 44.9342     |
| CTRL - rhMBL_2 | 24.2243     | 24.2058     | 41.2808     | n.d.        |
| CTRL - rhMBL_3 | 23.3814     | 23.3049     | 44.3157     | 47.2875     |
| CTRL - rhMBL_4 | 24.2128     | 24.1776     | n.d.        | 45.2901     |
| CTRL + rhMBL_1 | 24.3447     | 23.8941     | 47.7502     | 41.4333     |
| CTRL + rhMBL_2 | 22.1381     | 22.1429     | 49.353      | 46.4006     |
| CTRL + rhMBL_3 | 23.3964     | 23.0969     | n.d.        | 38.4187     |
| CTRL + rhMBL_4 | 22.5228     | 23.101      | 47.3106     | 44.651      |
| HYP - rhMBL_1  | 24.6245     | 24.6224     | n.d.        | 47.9781     |
| HYP - rhMBL_2  | 26.863      | 26.8813     | n.d.        | n.d.        |
| HYP - rhMBL_3  | 25.4465     | 25.6317     | n.d.        | 43.782      |
| HYP - rhMBL_4  | 25.5019     | 25.4516     | n.d.        | n.d.        |
| HYP + rhMBL_1  | 20.2238     | 20.3731     | 40.2955     | 40.3622     |
| HYP + rhMBL_2  | 21.402      | 21.3146     | n.d.        | n.d.        |
| HYP + rhMBL_3  | 27.2262     | 27.3012     | 47.3482     | 48.5651     |
| HYP + rhMBL_4  | 20.7267     | 20.6429     | 43.7209     | 41.5827     |
| HepG2          | 27.4396     | 26.5395     | 33.4355     | 35.4177     |
| Blank          | 37.0481     | 36.6288     | 42.1885     | n.d.        |
